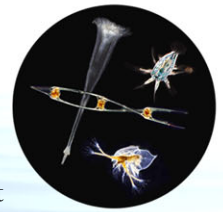

*J. Plankton Res.* (2017) 39(5): 836–842. First published online August 11, 2017 doi:10.1093/plankt/fbx043

# Contrasting diel vertical migration patterns in *Salpa fusiformis* populations

M. PASCUAL<sup>1\*</sup>, J. L. ACUÑA<sup>2</sup>, A. SABATÉS<sup>1</sup>, V. RAYA<sup>1</sup> AND V. FUENTES<sup>1</sup>

<sup>1</sup>INSTITUT DE CIÈNCIES DEL MAR-CSIC, PASSEIG MARÍTIM DE LA BARCELONETA 37-49, 08003 BARCELONA, SPAIN AND <sup>2</sup>UNIVERSIDAD DE OVIEDO, CALLE SAN FRANCISCO, 1, 33003 OVIEDO, SPAIN

\*CORRESPONDING AUTHOR: mpascual@icm.csic.es

Received February 1, 2017; editorial decision July 18, 2017; accepted July 20, 2017

Corresponding editor: Roger Harris

Vertically stratified zooplankton sampling at three locations in the Catalan Sea demonstrated that the coexistence of two diel vertical migration patterns in *Salpa fusiformis* populations. Salps migrated to the surface during the day (reverse migration) at one station while they swam to surface layers at night (nocturnal migration) at the other two stations. While nocturnal migration was significant at the deepest station, reverse and nocturnal migrations at shallow stations were weak. Our data support the idea of reproductive, surface aggregation in this species, with a possibility that the larger individuals hit the bottom at the shallower stations, resulting in an apparently random migration pattern.

**KEYWORDS:** population growth; reverse migration; salps; pelagic tunicates

## INTRODUCTION

Diel vertical migration (DVM) is a behavioral pattern where organisms swim vertically through the water column in a daily cycle. Differences in this migration pattern can be inter- or intra- specific (Osgood and Frost, 1994; Dale and Kaartvedt, 2000; Holliland *et al.*, 2012) and individuals can change their behavior depending on the environmental conditions (Ohman, 1990; Fischer *et al.*, 2015). Hypotheses explaining DVM in each situation are still under study. The most common DVM pattern is when individuals reach the surface at night, and remain in deeper waters during the day (“nocturnal migration”). This behavior is attributed

to a trade-off between finding food at the surface and avoiding being eaten by their visual predators (Lampert, 1989). This hypothesis fails to explain DVM behavior for migrants without visual predators or for reverse migrations, where the individuals are at the surface during the day and at deeper depths at night (Hamner *et al.*, 1982; Ohman, 1990). Alternatively, other hypotheses have been suggested: migrators are following migrating prey (Hamner *et al.*, 1982; Sims *et al.*, 2005), they escape from migrating predators (Ohman *et al.*, 1983), reduce their metabolic expenditures (Enright, 1977), or aggregate for reproduction (Purcell and Madin, 1991).

Salp migration cannot be explained by avoidance of visual predation since their transparent, barrel-shaped bodies are hardly visible, even during daytime, and some species migrate entirely within the photic layer (Purcell and Madin, 1991). Purcell and Madin (1991) hypothesized that *C. baekeri* migrates to the surface at night to aggregate and increase mating success. Aggregations are essential for salp blooms since their sexual reproduction is based on internal fertilization (Boldrin et al., 2009) and it is a key for maintaining genetic variability (Aldredge and Madin, 1982). Apart from this possibility, additional hypotheses are required to explain why some salp species do not migrate (i.e. *Thalia democratica* (Sardou et al., 1996; Gibbons, 1997)) and other species show unclear migration patterns. This is the case of *Salpa fusiformis* whose migration is subject to controversy: some studies report nocturnal migration (Franqueville, 1971; Andersen et al., 1998; Nogueira Júnior et al., 2015) while others mention weak or no migration (Laval et al., 1992; Tsuda and Nemoto, 1992; Sardou et al., 1996). Liu et al. (2012) first reported reverse DVM of *S. fusiformis* but only when the population was dominated by solitary and smaller aggregate forms, which suggests that the salps were actively reproducing. These findings highlight the importance of considering population structure in DVM studies of salps. Although they do not explain the migration patterns observed, their contrasting results might indicate that *S. fusiformis* changes its migratory behavior depending on different circumstances.

Here, we report on the DVM of *S. fusiformis* in the NW Mediterranean Sea and evaluate the role of population structure and water column characteristics on migration patterns. Specifically, we assess whether *S. fusiformis* performed DVM and if so, if the migratory pattern was consistent at all of the surveyed locations.

## METHOD

### Field sampling

Sampling was conducted from June 26 to July 7 2011 in the Catalan Sea, northwestern Mediterranean Sea, as part of the “Fishjelly Project” cruise. Three stations located at different depths were selected: “Sh” (41° 23.27' N, 2° 32.18' E; depth = 118 m) on the continental shelf, “ShB” (40° 54.30' N, 1° 19.26' E; depth = 190 m) at the shelf-break and “SI” (41° 10.75' N, 2° 27.57' E; depth = 600 m) over the slope (Fig. 1). Depth-stratified zooplankton sampling was performed during two consecutive day-night pairs, avoiding sunset and sunrise hours. A MOCNESS net, 1 m<sup>2</sup> opening mouth and 300 µm mesh,

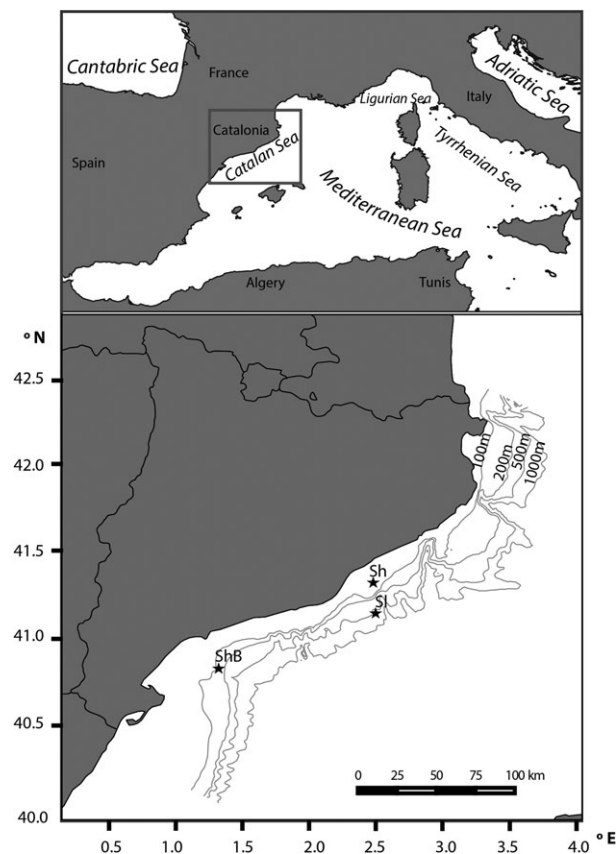

**Fig. 1.** Sampling locations within the Catalan Sea, northwestern Mediterranean Sea: on the continental shelf (“Sh”), on the shelf-break (“ShB”) and on the slope (“SI”).

was deployed to collect the samples obliquely, moving from deep to shallow layers, at a ship speed of 2–2.5 knots. Depth intervals were defined according to the maximum depth in each station (Sh: 25, 50, 75 and 100 m, ShB: 25, 50, 100 and 150 m; Slope: 25, 50, 100, 150, 250, 400 and 550 m). The volume of water filtered by each net was recorded by a flowmeter attached to the mouth of the net. Zooplankton samples were preserved in a 5% buffered formaldehyde solution immediately after collection. Vertical profiles of temperature, salinity and fluorescence were obtained by deploying a Neil Brown Mark III- CTD equipped with a Sea-Tech fluorometer. To calibrate the fluorometer, water samples for chlorophyll-a determination were collected with Niskin bottles mounted on a rosette system and closed at different depths, including the deep chlorophyll maximum (DCM), throughout day and night.

### Laboratory analysis

Chlorophyll-a extraction was done in 90% acetone and fluorescence was measured with a Turner designs

fluorometer (Sunnyway, CA) after storage at 4°C during 24 h (Venrick and Hayward, 1984). The number of individuals of each salp species and solitary/aggregate form were counted using a dissection stereoscope and separated from the zooplankton sample. Density estimates were calculated by dividing the counts by the volume of water filtered and then multiplying by the depth range of each stratum, to facilitate comparisons among strata. Densities were standardized to individuals per 100 m<sup>2</sup>. Individuals with signs of degradation were considered as sinking dead bodies and were not included in the analysis (i.e. body broken, tissue very fragile and muscular bands hard to identify). However, this was only the case of approximately less than five individuals per station. We took pictures of individuals in each sample using a Zooscan (Grosjean *et al.*, 2004). A maximum of 400 individuals per each species and solitary/aggregate form were measured digitally with image J software (Abramoff *et al.*, 2004) from the posterior ridge of the gut to the oral opening (Foxton, 1966). Live length was used to classify individuals by stage after correction for shrinkage. We measured a few individuals before adding formalin, and repeated the measurements 2 years later, and determined a percentage of shrinkage of 16%. Salps life cycle is based on a combination of asexual and sexual phases. In the asexual reproduction, solitary forms, also called oozoids, produce chains of females called blastozoids or aggregate forms. During the sexual reproduction, newborn females are impregnated and internally

develop an embryo. Females will become males once they give birth to the young oozoid, closing the cycle. Accordingly, we classified *S. fusiformis* into five different life stages using size ranges extracted from Braconnot *et al.* (1988): B1 (<4 mm) blastozoids just released or still in the oozoid (in case that they have been accidentally released during manipulation), B2 (4–18 mm) females that start developing the embryo, B3 (>18 mm) females who have given birth (males), O1 (<13 mm) oozoids that have not liberated the first chain yet, O2 (≥13 mm) productive oozoids which are actively producing chains. We calculated the relative frequencies of each stage over the total number of individuals measured. We then estimated the densities of each stage in the sample by multiplying those frequencies by the total density of organisms.

Non-salp zooplankton was counted and identified according to coarse taxonomic categories (amphipoda, crustacean larvae, copepoda, appendicularia, cladocera, doliolida, chaetognatha, echinodermata, ostracoda and mollusca). When the number of individuals exceeded 100, we subsampled and extrapolated the count to the whole sample. Densities were determined using the same calculations as for salps and then standardized to 100 m<sup>2</sup>.

### Statistical analysis

To test for DVM in each stage of *S. fusiformis*, other salp species and each non-salp zooplankton groups (Table I)

*Table I: WMD (Mean ± SD) of S. fusiformis (divided in the different life stages: B1, B2, B3, O1, O2), T. democratica and the non-salp zooplankton species in the three stations (Shelf (Sh), Shelf-break (ShB) and Slope (Sl)) during day and night. “Pv” stands for the resulting P-value in the analysis of the variance. Statistically significant P-values (Pv < 0.05) are highlighted in bold.*

| Species/stage             | Shelf (Sh)  |             |              | Shelf-break (ShB) |             |             | Slope (Sl)    |             |             |
|---------------------------|-------------|-------------|--------------|-------------------|-------------|-------------|---------------|-------------|-------------|
|                           | Day         | Night       | Pv           | Day               | Night       | Pv          | Day           | Night       | Pv          |
| <i>Salpa fusiformis</i>   |             |             |              |                   |             |             |               |             |             |
| Total                     | 26.7 ± 6.4  | 53.1 ± 7.2  | 0.06         | 96.1 ± 25.2       | 48.8 ± 31.0 | 0.24        | 366.8 ± 91.1  | 33.8 ± 28.1 | <b>0.04</b> |
| Blastozoids (B1)          | 30.5 ± 7.0  | 59.0 ± 4.9  | <b>0.04</b>  | 37.5 ± 53.0       | 21.8 ± 7.7  | 0.72        | 276.9 ± 113.8 | 18.5 ± 7.1  | 0.09        |
| Blastozoids (B2)          | 21.7 ± 6.4  | 39.4 ± 3.9  | 0.08         | 97.3 ± 23.4       | 49.4 ± 32.7 | 0.23        | 376.3 ± 84.2  | 34.5 ± 29.1 | <b>0.03</b> |
| Blastozoids (B3)          | 6.3 ± 8.8   | 18.8 ± 26.5 | 0.59         |                   |             |             |               |             |             |
| Oozoids (O1)              | 42.2 ± 17.7 | 48.7 ± 9.3  | 0.69         |                   |             |             | 356.8 ± 167.2 | 22.9 ± 7.6  | 0.11        |
| Oozoids (O2)              | 34.8 ± 5.3  | 72.3 ± 1.9  | <b>0.01</b>  |                   |             |             |               | 25.0 ± 17.7 | 0.18        |
| <i>Thalia democratica</i> | 15.1 ± 3.7  | 29.2 ± 19.3 | 0.41         | 20.1 ± 4.6        | 20.5 ± 0.7  | 0.92        | 15.4 ± 2.6    | 12.7 ± 0.3  | 0.29        |
| Amphipods                 | 32.5 ± 5.2  | 26.5 ± 5.8  | 0.39         | 90.9 ± 48.3       | 71.5 ± 50.0 | 0.73        | 87.0 ± 27.9   | 39.5 ± 15.1 | 0.17        |
| Crustacean larvae         | 55.2 ± 0.1  | 44.2 ± 8.2  | 0.2          | 80.6 ± 27.2       | 47.9 ± 1.2  | 0.23        | 62.1 ± 21.8   | 54.5 ± 8.7  | 0.69        |
| Copepoda                  | 45.5 ± 10.3 | 33.7 ± 3.0  | 0.26         | 58.1 ± 3.1        | 43.1 ± 12.4 | 0.24        | 65.4 ± 13.5   | 55.2 ± 2.9  | 0.4         |
| Appendicularia            | 61.1 ± 2.3  | 31.0 ± 1.0  | <b>0.003</b> | 69.9 ± 7.2        | 21.9 ± 13.1 | <b>0.05</b> | 59.2 ± 17.1   | 67.9 ± 9.8  | 0.6         |
| Cladocera                 | 13.4 ± 0.2  | 13.2 ± 0.4  | 0.53         | 19.1 ± 8.1        | 27.0 ± 19.2 | 0.64        | 23.4 ± 1.5    | 21.1 ± 1.4  | 0.24        |
| Doliolida                 | 33.0 ± 7.3  | 19.7 ± 7.6  | 0.22         | 12.9 ± 0.3        | 13.6 ± 0.7  | 0.29        | 24.5 ± 7.5    | 37.8 ± 31.0 | 0.61        |
| Chaetognatha              | 34.2 ± 6.4  | 21.3 ± 9.2  | 0.24         | 24.7 ± 1.4        | 17.3 ± 1.7  | <b>0.04</b> | 31.4 ± 0.1    | 31.7 ± 22.4 | 0.99        |
| Echinodermata             | 38.4 ± 19.5 | 17.8 ± 0.1  | 0.27         | 67.2 ± 9.3        | 37.1 ± 17.6 | 0.17        | 29.4 ± 10.9   | 16.8 ± 3.8  | 0.26        |
| Ostracoda                 | 73.6 ± 2.6  | 40.9 ± 7.6  | <b>0.03</b>  | 90.7 ± 14.9       | 84.2 ± 16.9 | 0.72        | 119.5 ± 6.6   | 90.9 ± 30.6 | 0.33        |
| Mollusca                  | 32.6 ± 13.7 | 25.3 ± 15.6 | 0.67         | 24.5 ± 6.2        | 17.9 ± 2.3  | 0.29        | 58.4 ± 13.9   | 35.7 ± 16.5 | 0.28        |

the weighted mean depth (WMD) was calculated for each sampling station and time as follows

$$\text{WMD}(m) = \frac{\sum(n_i * d_i)}{\sum n_i}$$

where  $n_i$  is the density of individuals of a given taxon in depth stratum  $i$  and  $d_i$  is the midpoint of stratum  $i$ . One-way ANOVAs were conducted to test for DVM at each station and two-way ANOVAs were used for the interaction between “day-night” and “station” factors. Data were log-transformed when they did not satisfy normality.

## RESULTS

The vertical structure of the water column was dominated by thermal stratification. Surface water temperature was around 22°C at stations Sh and Sl and slightly higher in ShB (23.10°C), remaining constant (~13.2°C) below 100 m depth. The vertical chlorophyll-*a* profiles showed a DCM located beneath the thermocline. Both maximum chlorophyll-*a* concentration (0.47, 0.53 and 0.53 mg m<sup>-3</sup> in stations Sh, ShB and Sl, respectively) and the depth of the DCM (80, 60 and 70 m in Sh, ShB and Sl, respectively) were similar at all stations (Fig. 2). Therefore, the most marked difference among stations was bottom depth.

*Salpa fusiformis* was found at different depth strata depending on the time of day and its migration pattern differed significantly among stations ( $F = 10.17$ ;  $P$ -value = 0.01) (Fig. 2). Individuals at station Sh were in the 0–50 m layer during the day and primarily in the 50–100 m stratum at night, although the pattern of the whole population was non-significant (Table I; Fig. 2). At stations ShB and Sl, *S. fusiformis* was found at depths below 50 m during the day but at night it was generally found between the surface and 50 m, except for the second night at ShB (Fig. 2). However, this trend was only significant at station Sl (Table I). Maximal total abundances differed among stations: 31 008 ind 100 m<sup>-2</sup> (Sh), 453 ind 100 m<sup>-2</sup> (ShB) and 2737 ind 100 m<sup>-2</sup> (Sl).

Stage composition also differed among stations. At station Sh all stages were present and productive oozoids (O2) and newborn blastozoids (B1) were dominant (Fig. 2). Both stages were the ones that performed a statistically significant reverse migration (Table I). At station ShB, the population was comprised of only females (B1 and B2) and no migration pattern was statistically significant (Fig. 2; Table I). At Sl there were females (B2) and oozoids that had not produced chains yet (O1), but very few productive oozoids (O2) and newborn blastozoids (B1). All stages were at the

surface at night with statistical significance of the total population and the females (B2) which dominated in the population (Table I). Males (B3) were only present at Sh the second night and day at 0–25 and 25–50 m stratum, respectively and in much lower numbers than the blastozoids (B1 and B2) (72.43 and 6.29 males in 100 m<sup>-2</sup>, for the second night and day, respectively).

The salp *T. democratica* was distributed mainly in the 0–30 m layer and did not show signs of DVM. Differences in WMD between day and night were not statistically significant for most non-salp zooplankton groups, except for appendicularians at Sh and ShB, ostracods at Sh and chaetognaths at ShB (Table I).

## DISCUSSION

This study is the first to report on the coexistence of different migration patterns, nocturnal and reverse, of a salp species within the same season and area (Fig. 2; Table I). Liu *et al.* (2012) found seasonal changes in DVM of *S. fusiformis* in the southern Yellow Sea, from inconsistent migratory behavior in December to a clear reverse DVM in May. Both studies hint at *S. fusiformis* varying its migration behavior in different environments, which would explain the contrasting patterns of DVM of *S. fusiformis* in previous research (Franqueville, 1971; Laval *et al.*, 1992; Tsuda and Nemoto, 1992; Andersen *et al.*, 1998). Variable DVM patterns have also been observed in other organisms: copepods ceased migration in lakes with very low water transparency (Fischer *et al.*, 2015) or in the absence of predators (Bollens, 1991); two cladoceran species changed their migration seasonally (nocturnal DVM in June, no migration in July and reverse DVM in September) depending on the presence of predators (Lagergren *et al.*, 2008); and basking sharks exhibited reverse migration depending on the habitat type, possibly tracking the movement of their zooplankton prey (Sims *et al.*, 2005).

The reason for a migration shift in salps is still unknown, but both patterns have been found independently in *S. fusiformis* populations. Nocturnal migration (station Sl, Fig. 2, Table I) has been reported for both *S. fusiformis* (Franqueville, 1971; Madin *et al.*, 1996; Andersen *et al.*, 1998; Nogueira Júnior *et al.*, 2015) and *Salpa aspera* (Wiebe *et al.*, 1979; Madin *et al.*, 2006). Reverse migration has been observed for *S. fusiformis* populations dominated by oozoids and small blastozoids in the Yellow Sea (Liu *et al.*, 2012), which clearly resembles our own findings of significant reverse migration of O2 and B1 at station Sh (Fig. 2, Table I). Weak migration of the whole population, not of separate

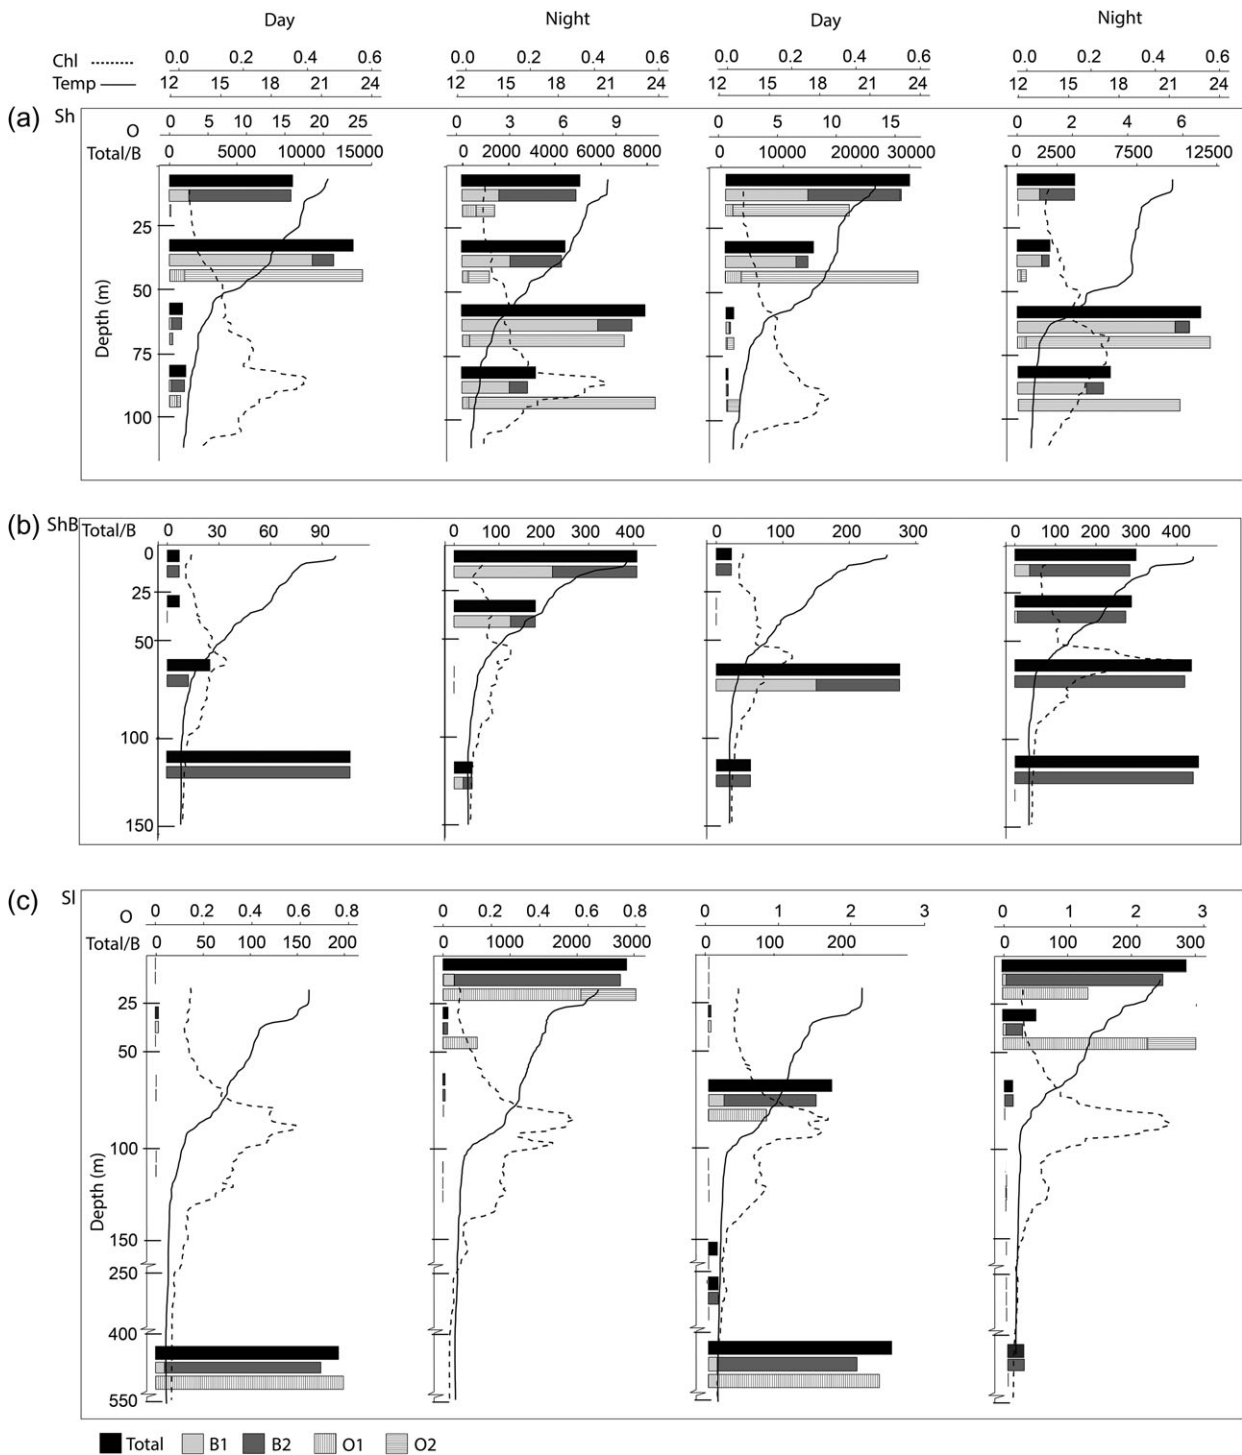

**Fig. 2.** *Salpa fusiformis* abundance (Ind m<sup>-2</sup>) at different depth strata during two consecutive pairs of day and night in stations (a) Sh (Shelf); (b) ShB (Shelf-break) and (c) SI (Slope). In each depth, upper bar portraits total salp abundance, middle bar are blastozooids (B) (B1 and B2) and lower bar represent oozoids (O) (O1 and O2). Note there is a specific scale for oozoids and another for blastozooids and total salp number (Total) together. Dashed lines indicate vertical chlorophyll-a profiles (Chl (mg m<sup>-3</sup>)) and continuous lines show temperature profiles (Temp (°C)).

stages, has also been observed in this species (Tsuda and Nemoto, 1992; Sardou et al., 1996), just like at our shallower stations Sh and ShB (Fig. 2, Table I).

Comparing the environment of the stations where salps performed weak migration (Sh and ShB) with the one with a clear nocturnal migration (SI) might help to

explain the contrasting patterns. Temperature and chlorophyll-a profiles were similar among stations and other zooplankton did not perform contrasting patterns: *T. democratica* was distributed within the first 30 m depth and did not exhibit DVM (Table I), in agreement with previous studies (Tsuda and Nemoto, 1992; Sardou *et al.*, 1996; Gibbons, 1997); and most non-salp zooplankton groups did not perform clear migration (Table I). The main difference is that Sh and ShB were much shallower than Sl. Considering that *S. fusiformis* is a fast swimmer (i.e. agg: 137–173 m h<sup>-1</sup>, Ooz: 137–238 m h<sup>-1</sup> (Bone and Trueman, 1983)) and migrates more than 600 m daily, the individuals might reach the bottom sooner at shallow stations (i.e. less than 200 m depth), which would potentially generate a range of apparent migration patterns including reverse migration. In this sense, the seasonal contrasting migration patterns found by Liu *et al.* (2012) also occurred at a shallow location (i.e. 70 m depth).

The diurnal ascent at the shallowest station does not seem to negatively affect *S. fusiformis*. High total abundance and dominance of oozoids at this station suggests that the population was actively reproducing (Liu *et al.*, 2012). Such active reverse migration indicates that they are neither avoiding mortality by visual predators (Lampert, 1989), nor reducing damage from short-wave solar radiation during the day (Hairston, 1976) or minimizing metabolic expense (Enright, 1977). Avoidance of non-visual predation could explain the nocturnal descent of *S. fusiformis* at Sh as in the case of *Pseudocalanus newmani* (Ohman *et al.*, 1983; Ohman, 1990). Salps have a variety of non-visual predators (e.g. cnidarians, ctenophores and amphipods) (Harbison, 1998) two of which were present in the study area: amphipods (mostly *Phronima sedentaria* which is also a parasite of *S. fusiformis* (Madin and Harbison, 1977)) and the jellyfish *Pelagia noctiluca* (Purcell *et al.*, 2014). However, we observed these two potential predators at all three stations (Tilves *et al.*, 2016), including Sl, where individuals performed nocturnal DVM. In contrast to all the hypotheses mentioned, the reproductive behavior hypothesis (Purcell and Madin, 1991) would explain either diurnal or nocturnal ascent. According to this hypothesis, salps increase fertilization success by aggregating at the surface, either at day or night (Madin *et al.*, 1996). Although some salp species are known to spawn at night (*T. democratica* (Heron, 1972) and *C. baekeri* (Purcell and Madin, 1991)), this has not been determined for *S. fusiformis* yet and in Sh and Sl population seemed to be actively reproducing either in day and night surface aggregations. Nevertheless, the apparently random migration pattern in shallow areas supporting the

aggregation for reproduction hypothesis has to be confirmed by increasing the number of shallow and deep stations sampled.

## CONCLUSIONS

In conclusion, this study demonstrates for the first time that a salp can perform both nocturnal and reverse migrations in the same area and season. Depth was the only variable which clearly differentiated the three stations. Migration was nocturnal at the deepest, slope station (600 m depth), weak at the shelf-break (190 m depth) and reverse, but only for some stages, at the shallowest, shelf station (118 m depth). Reverse migration rules out avoidance of visual predators, of UV radiation, and reduction of metabolic expenses as potential explanations for DVM of salps, leaving mating aggregation as the most likely mechanism.

## ACKNOWLEDGEMENTS

We acknowledge with many thanks to all crew members of Garcia del Cid cruise and staff from the Fishjelly project who took part of the sampling. We also thank Annette Govindarajan (Woods Hole Oceanographic Institution) for the English review and expertise and the two anonymous reviewers for their constructive comments which have improved the paper substantially. This study is a contribution of the Marine Zooplankton Ecology Group (2014SGR-498) at the Institut de Ciències del Mar–Consejo Superior de Investigaciones Científicas.

## FUNDING

Funded by Ministerio de Ciencia e Innovación under the Fishjelly project (MAR-CTM2010-18875).

## REFERENCES

- Abramoff, M. D., Magalhães, P. J. and Ram, S. J. (2004) Image processing with image. *J. Biophotonics Int.*, **11**, 36–42.
- Allredge, A. L. and Madin, L. P. (1982) Pelagic tunicates: unique herbivores in the marine plankton. *Bioscience.*, **32**, 655–663 doi:10.2307/1308815.
- Andersen, V., François, F., Sardou, J., Picheral, M., Scotto, M. and Nival, P. (1998) Vertical distributions of macroplankton and micronekton in the Ligurian and Tyrrhenian seas (northwestern Mediterranean). *Oceanologica Acta*, **21**, 655–676.

- Boldrin, F., Martinucci, G., Holland, L. Z., Miller, R. L. and Burighel, P. (2009) Internal fertilization in the salp *Thalia democratica*. *Can. J. Zool.*, **87**, 928–940.
- Bollens, S. M. (1991) Diel vertical migration in zooplankton: rapid individual response to predators. *J. Plankton Res.*, **13**, 1359–1365.
- Bone, Q. and Trueman, E. R. (1983) Jet propulsion in salps (Tunicata: Thaliacea). *J. Zool.*, **201**, 481–506 doi:10.1111/j.1469-7998.1983.tb05071.x.
- Braconnot, J. C., Choe, S. M. and Nival, P. (1988) La croissance et le développement de *Salpa fusiformis* Cuvier (Tunicata, Thaliacea). *Ann l'Institut océanographique*, **64**, 101–114.
- Dale, T. and Kaartvedt, S. (2000) Diel patterns in stage-specific vertical migration of *Calanus finmarchicus* in habitats with midnight sun. *ICES J. Mar. Sci.*, **57**, 1800–1818 doi:10.1006/jmsc.2000.0961.
- Enright, J. T. (1977) Diurnal vertical migration: adaptive significance and timing. Part 1. Selective advantage: a metabolic model. *Limnol. Oceanogr.*, **22**, 856–872 doi:10.4319/lo.1977.22.5.0856.
- Fischer, J. M., Olson, M. H., Theodore, N., Williamson, C. E., Rose, K. C. and Hwang, J. (2015) Diel vertical migration of copepods in mountain lakes: the changing role of ultraviolet radiation across a transparency gradient. *Limnol. Oceanogr.*, **60**, 252–262.
- Foxton, P. (1966) The distribution and life-history of *Salpa thompsoni* Foxton with observations on a related species, *Salpa gerralchei* Foxton. Discovery Reports. Cambridge University Press, 24, 1–116.
- Franqueville, C. (1971) Macroplankton profond (invertébrés) de la Méditerranée nord-occidentale. *Tethys*, **3**, 11–56.
- Gibbons, M. J. (1997) Vertical distribution and feeding of *Thalia democratica* on the Agulhas Bank during march 1994. *J. Mar. Biol. Assoc. United Kingdom*, **77**, 493–505 doi:10.1017/S0025315400071824.
- Grosjean, P., Picheral, M., Warembourg, C. and Gorsky, G. (2004) Enumeration, measurement, and identification of net zooplankton samples using the ZOO SCAN digital imaging system. *ICES J. Mar. Sci.*, **61**, 518–525 doi:10.1016/j.icesjms.2004.03.012.
- Hairton, N. G. Jr (1976) Photoprotection by carotenoid pigments in the copepod *Diaptomus neocadensis*. *Proc. Nat. Acad. Sci. USA*, **73**, 971–974.
- Hamner, W. M., Gilmer, R. W. and Hamner, P. P. (1982) The physical chemical and biological characteristics of a stratified saline sulfide lake in Palau western Caroline Islands. *Limnol. Oceanogr.*, **27**, 896–909.
- Harbison, G. R. (1998) The parasites and predators of Thaliacea. In: *The Biology of pelagic tunicates*. pp 187–214.
- Heron, A. C. (1972) Population ecology of a colonizing species: the pelagic tunicate *Thalia democratica*. I. Individual growth rate and generation time. *Oecol.*, **10**, 269–293.
- Holliland, P. B., Ahlbeck, I., Westlund, E. and Hansson, S. (2012) Ontogenetic and seasonal changes in diel vertical migration amplitude of the calanoid copepods *Eurytemora affinis* and *Acartia spp.* in a coastal area of the northern Baltic proper. *J. Plankton Res.*, **34**, 298–307 doi:10.1093/plankt/fbs001.
- Lagergren, R., Leberfinger, K. and Stenson, J. A. E. (2008) Seasonal and ontogenetic variation in diel vertical migration of *Chaoborus flavicans* and its effect on depth-selection behavior of other zooplankton. *Limnol. Oceanogr.*, **53**, 1083–1092.
- Lampert, W. (1989) The adaptive significance of diel vertical migration of zooplankton. *Funct. Ecol.*, **3**, 21–27 doi:10.2307/2389671.
- Laval, P., Braconnot, J.-C. and da Silva, L. (1992) Deep planktonic filter-feeders found in the aphotic zone with Cyana submersible in the Ligurian Sea (NW Mediterranean). *Mar. Ecol. Prog. Ser.*, **79**, 235–241.
- Liu, Y., Sun, S. and Zhang, G. (2012) Seasonal variation in abundance, diel vertical migration and body size of pelagic tunicate *Salpa fusiformis* in the Southern Yellow Sea. *Chinese J. Oceanol. Limnol.*, **30**, 92–104 doi:10.1007/s00343-012-1048-4.
- Madin, L. P. and Harbison, G. R. (1977) The associations of Amphipoda *Hyperidea* with gelatinous zooplankton—I. Associations with Salpidae. *Deep Sea Res.*, **24**, 449–463.
- Madin, L. P., Kremer, P. and Hacker, S. (1996) Distribution and vertical migration of salps (Tunicata, Thaliacea) near Bermuda. *J. Plankton Res.*, **18**, 747–755 doi:10.1093/plankt/18.5.747.
- Madin, L. P., Kremer, P., Wiebe, P. H., Purcell, J. E., Horgan, E. H. and Nemazie, D. A. (2006) Periodic swarms of the salp *Salpa aspera* in the Slope Water off the NE United States: Biovolume, vertical migration, grazing, and vertical flux. *Deep Sea Res. I*, **53**, 804–819 doi:10.1016/j.dsr.2005.12.018.
- Nogueira Júnior, M., Brandini, F. P. and Codina, J. C. U. (2015) Diel vertical dynamics of gelatinous zooplankton (cnidaria, ctenophora and thaliacea) in a subtropical stratified ecosystem (south Brazilian Bight). *PLoS ONE*, **10**, e0144161, doi:10.1371/journal.pone.0144161.
- Ohman, M. D. (1990) The demographic benefits of diel vertical migration by zooplankton. *Ecol. Monogr.*, **60**, 257–281.
- Ohman, M. D., Frost, B. W. and Cohen, E. B. (1983) Reverse diel vertical migration: an escape from invertebrate predators. *Science*, **220**, 1404–1407 doi:10.1126/science.220.4604.1404.
- Osgood, K. E. and Frost, B. W. (1994) Ontogenetic diel vertical migration behaviors of the marine planktonic copepods *Calanus pacificus* and *Metridia lucens*. *Mar. Ecol. Prog. Ser.*, **104**, 13–25 doi:10.3354/meps104013.
- Purcell, J. E. and Madin, L. P. (1991) Diel patterns of migration, feeding, and spawning by salps in the subarctic Pacific. *Mar. Ecol. Prog. Ser.*, **73**, 211–217.
- Purcell, J. E., Tilves, U., Fuentes, V. L., Milisenda, G., Olariaga, A. and Sabatés, A. (2014) Digestion times and predation potentials of *Pelagia noctiluca* eating fish larvae and copepods in the NW Mediterranean Sea. *Mar. Ecol. Prog. Ser.*, **510**, 201–213 doi:10.3354/meps10790.
- Sardou, J., Etienne, M. and Andersen, V. (1996) Seasonal abundance and vertical distributions of macroplankton and micronekton of the northwestern Mediterranean Sea. *Oecologia Acta*, **19**, 645–656.
- Sims, D. W., Southall, E. J., Tarling, G. A. and Metcalfe, J. D. (2005) Habitat-specific normal and reverse diel vertical migration in the plankton-feeding basking shark. *J. Anim. Ecol.*, **74**, 755–761 doi:10.1111/j.1365-2656.2005.00971.
- Tilves, U., Fuentes, V., Purcell, J. E., Torrents, A., Pascual, M., Raya, V., Gili, J.-M. and Sabatés, A. (2016) Natural diet and predation impacts of *Pelagia noctiluca* on fish eggs and larvae in the NW Mediterranean. *J. Plankton Res.*, **38**, 1243–1254.
- Tsuda, A. and Nemoto, T. (1992) Distribution and growth of salps in a Kuroshio warm-core ring during summer 1987. *Deep Sea Res. Part A*, **39**, S219–S229 doi:10.1016/S0198-0149(11)80013-0.
- Turner Designs. Sunnyvale, CA., [www.turnerdesigns.com](http://www.turnerdesigns.com)
- Venrick, E. L. and Hayward, T. L. (1984) Determining chlorophyll on the 1984 CALCOFI surveys. *CalCOFI Rep.*, **25**, 74–79.
- Wiebe, P. H., Madin, L. P., Haury, L. R., Harbison, G. R. and Philbin, L. M. (1979) Diel vertical migration by *Salpa aspera* and its potential for large-scale particulate organic matter transport to the deep-sea. *Mar. Biol.*, **53**, 249–255 doi:10.1007/BF00952433.
